# Supplementary material for: Hepatoprotective Potential of Chestnut Bee Pollen on Carbon Tetrachloride-Induced Hepatic Damages in Rats
Source: Hindawi journal article supplement (doi:10.1155/2013/461478), 2013-01-01
Supplement: f1 [file 461478.f1.pdf]

**Supplementary Table 1.** Palynological identification of pollen sources within the pollen samples used in the study

| <b>Species</b>                                     | <b>Percentage (%)</b> |
|----------------------------------------------------|-----------------------|
| Fabaceae (Medicago spp., Trifolium spp)            |                       |
| Fagaceae (Castania sativa L.)                      | 45%                   |
| Asteraceae (Aster spp., Cirsium spp., Carduus spp) |                       |
| Apiaceae (Apium spp.)                              |                       |
| Caryophyllaceae (Dianthus spp.)                    |                       |
| Poaceae (Zea may)                                  |                       |
| Rosaceae (Malus spp.)                              |                       |
| Myrtaceae (Myrtus communis)                        |                       |
| Rhamnaceae (Rhamnus cathartica)                    |                       |

**Supplementary Table 2.** Experimental and control groups used in this study

| <b>Groups</b>                      | <b>Treatment</b>                                                                 |
|------------------------------------|----------------------------------------------------------------------------------|
| G1 ( <i>Control</i> )              | 0.9% NaCl (i.p.)                                                                 |
| G2 ( <i>Control</i> )              | 0,8 ml/kg Olive oil (i.p.)                                                       |
| G3 ( <i>Control</i> )              | 0,8 ml/kg Ethanol (i.p.)                                                         |
| G4 ( <i>CCI<sub>4</sub>-only</i> ) | 0,8 ml/kg CCI <sub>4</sub> in olive oil (i.p.) only                              |
| G5 ( <i>Silibinin</i> )            | 0,8 ml/kg CCI <sub>4</sub> in olive oil (i.p.) + Silibinin (50 mg/kg/day) gavage |
| G6 ( <i>Low Pollen</i> )           | 0,8 ml/kg CCI <sub>4</sub> in olive oil (i.p.) + Pollen (200 mg/kg/day) gavage   |
| G7 ( <i>High Pollen</i> )          | 0,8 ml/kg CCI <sub>4</sub> in olive oil (i.p.) + Pollen (400 mg/kg/day) gavage   |

i.p.: Intraperitoneal
